# Supplementary material for: Availability of facility resources and services and infection-related maternal outcomes in the WHO Global Maternal Sepsis Study: a cross-sectional study
Source: PubMed Central journal article supplement (PMC8370881; doi:10.1016/s2214-109x(21)00248-5), 2021-07-21
Supplement: mmc1.pdf [file mmc1.pdf]

# THE LANCET

## Global Health

### Supplementary appendix

This appendix formed part of the original submission and has been peer reviewed. We post it as supplied by the authors.

Supplement to: Brizuela V, Cuesta C, Bartolelli, G, et al. Availability of facility resources and services and infection-related maternal outcomes in the WHO Global Maternal Sepsis Study: a cross-sectional study. *Lancet Glob Health* 2021; published online July 14. [http://dx.doi.org/10.1016/S2214-109X\(21\)00248-5](http://dx.doi.org/10.1016/S2214-109X(21)00248-5).

## APPENDIX

### 1. Key methods and variables used for GLOSS and current analysis

|                                                                                                  |                                                                                                                                                                                                                                                                                                                                                                                                                                                                                                                                                                                                                                                                                                                                                                                                       |
|--------------------------------------------------------------------------------------------------|-------------------------------------------------------------------------------------------------------------------------------------------------------------------------------------------------------------------------------------------------------------------------------------------------------------------------------------------------------------------------------------------------------------------------------------------------------------------------------------------------------------------------------------------------------------------------------------------------------------------------------------------------------------------------------------------------------------------------------------------------------------------------------------------------------|
| <p><b>GLOSS inclusion criteria</b></p> <p>a- Eligible geographical areas within each country</p> | <ul style="list-style-type: none"> <li>• Known number of inhabitants and of at least two million</li> <li>• At least 30% institutional birth coverage</li> <li>• At least 15,000 births/year total among all healthcare facilities within the area</li> <li>• At least one referral health facility able to provide comprehensive emergency obstetric and neonatal care</li> </ul>                                                                                                                                                                                                                                                                                                                                                                                                                    |
| <p>b- Eligible facilities</p>                                                                    | <ul style="list-style-type: none"> <li>• Provides obstetric, midwifery or post-abortion care (i.e. admits women for birth (live birth or stillbirth) or abortion (spontaneous or induced)/post-abortion care)</li> <li>• Has an emergency room, adult ward, intensive care unit, or special care unit or any other setting where women can be admitted due to complications during pregnancy, childbirth or during the first 42 days after the end of pregnancy</li> </ul> <p>For maternity hospitals:</p> <ul style="list-style-type: none"> <li>○ Minimal number of 1,000 births per facility/per year OR minimal level of care (e.g. tertiary and secondary level, national and district hospitals)</li> <li>○ About 80% coverage of all facility-based births in the geographical area</li> </ul> |
| <p>c- Eligible women</p>                                                                         | <p>Pregnant or recently pregnant women hospitalized in any of the participating facilities with any of the following:</p> <ul style="list-style-type: none"> <li>• Any suspected or confirmed infection during the current hospital stay (primary admission or readmission)</li> <li>• Any clinical signs suggestive of infection (e.g. fever)</li> <li>• Request for any body fluid culture or swab specimens</li> <li>• Non-prophylactic use of antibiotics or other antimicrobial drugs at admission or during hospital stay</li> <li>• Any health care-associated infections</li> <li>• Any unexplained organ-dysfunction</li> <li>• Any maternal death</li> </ul>                                                                                                                                |
| <p><b>Inclusion criteria for this analysis</b></p>                                               | <ul style="list-style-type: none"> <li>• GLOSS participating facilities that collected facility-level data</li> </ul>                                                                                                                                                                                                                                                                                                                                                                                                                                                                                                                                                                                                                                                                                 |
| <p><b>Types of analyses conducted</b></p>                                                        | <ul style="list-style-type: none"> <li>• Proportions for facility characteristics by country income and severity of maternal outcome</li> <li>• Compliance with clinical and laboratory assessments as low, intermediate, or high</li> <li>• Logistic multilevel mixed model for the association between facility and women characteristics and severe maternal outcome</li> </ul>                                                                                                                                                                                                                                                                                                                                                                                                                    |
| <p><b>Variables included in the models</b></p>                                                   | <p><b>Facility level variables</b></p> <p>Categories in between brackets. If none stated, then assume yes/no.</p> <p><i>General characteristics</i></p> <ul style="list-style-type: none"> <li>• Country income group (low-income; middle-income; upper-middle/high-income)</li> </ul>                                                                                                                                                                                                                                                                                                                                                                                                                                                                                                                |

- Facility type (public; not public)
- Location (urban; peri-urban/rural)
- Size in live births/year (<1,000, ≥ 1000 & ≤ 2499, ≥ 2500 & ≤ 4499, ≥ 4500)

*Obstetric capacity*

- BEmONC

*Infection prevention*

- Availability of infection prevention committee
- Availability of resources for sanitation
- Availability of resources for hygiene
- Availability of resources for waste management

*Clinical capacity*

- Capacity to perform cultures

*Compliance with clinical and laboratory assessments*

- Compliance with clinical and laboratory assessments at enrolment in the study (low; high)

**Individual level variables**

Categories in between brackets. If none stated, then assume yes/no.

- Age (continuous)
- Gestational age (continuous)
- Pre-existing conditions
- Anaemia
- Previous births (0; 1 or 2; >2)
- Provenance of woman at enrolment (home; already hospitalized; transferred from another hospital)
- Mode of end of pregnancy (abortion; vaginal birth; caesarean birth)

---

*Source:* Bonet M, Souza JP, Abalos E, Fawole B, Knight M, Kouanda S, Lumbiganon P, Nabhan A, Nadisauskiene R, Brizuela V, Gülmezoglu AM. The global maternal sepsis study and awareness campaign (GLOSS): study protocol. *Reproductive health*. 2018 Dec;15(1):1-7.

## 2. STROBE checklist used for this analysis

|                           | <b>Item</b> | <b>Recommendation</b>                                                                                                                                                                | <b>Page</b> | <b>Relevant section in manuscript</b>                                                                                                                             |
|---------------------------|-------------|--------------------------------------------------------------------------------------------------------------------------------------------------------------------------------------|-------------|-------------------------------------------------------------------------------------------------------------------------------------------------------------------|
| <b>Title and abstract</b> | 1           | (a) Indicate the study's design with a commonly used term in the title or the abstract                                                                                               | Title page  | Title: "Availability of facility resources and services and infection-related maternal outcomes in the WHO Global Maternal Sepsis Study: a cross-sectional study" |
|                           |             | (b) Provide in the abstract an informative and balanced summary of what was done and what was found                                                                                  | 3-4         | Abstract included at the beginning summarizing the background, methods, findings, and interpretation.                                                             |
| <b>Introduction</b>       |             |                                                                                                                                                                                      |             |                                                                                                                                                                   |
| Background/rationale      | 2           | Explain the scientific background and rationale for the investigation being reported                                                                                                 | 5-6         | Introduction section                                                                                                                                              |
| Objectives                | 3           | State specific objectives, including any prespecified hypotheses                                                                                                                     | 6           | Last paragraph in introduction section                                                                                                                            |
| <b>Methods</b>            |             |                                                                                                                                                                                      |             |                                                                                                                                                                   |
| Study design              | 4           | Present key elements of study design early in the paper                                                                                                                              | 6-8         | Methods section                                                                                                                                                   |
| Setting                   | 5           | Describe the setting, locations, and relevant dates, including periods of recruitment, exposure, follow-up, and data collection                                                      | 6-8         | Methods section and appendix 1                                                                                                                                    |
| Participants              | 6           | (a) Give the eligibility criteria, and the sources and methods of selection of participants                                                                                          | 6-8         | Methods section and appendix 1                                                                                                                                    |
| Variables                 | 7           | Clearly define all outcomes, exposures, predictors, potential confounders, and effect modifiers. Give diagnostic criteria, if applicable                                             | 8-9         | Data analysis sub-section and appendix 1                                                                                                                          |
| Data sources/measurement  | 8*          | For each variable of interest, give sources of data and details of methods of assessment (measurement). Describe comparability of assessment methods if there is more than one group | 6-9         | Methods section and appendix 1                                                                                                                                    |
| Bias                      | 9           | Describe any efforts to address potential sources of bias                                                                                                                            | N/A         |                                                                                                                                                                   |
| Study size                | 10          | Explain how the study size was arrived at                                                                                                                                            | 6-8         | Methods section and appendix 1                                                                                                                                    |
| Quantitative variables    | 11          | Explain how quantitative variables were handled in the analyses. If applicable, describe which groupings were chosen and why                                                         | 8-9         | Data analysis sub-section                                                                                                                                         |
| Statistical methods       | 12          | (a) Describe all statistical methods, including those used to control for confounding                                                                                                | 8-9         | Data analysis sub-section                                                                                                                                         |

|                   |     |                                                                                                                                                                                                              |       |                                                                                                                                 |
|-------------------|-----|--------------------------------------------------------------------------------------------------------------------------------------------------------------------------------------------------------------|-------|---------------------------------------------------------------------------------------------------------------------------------|
|                   |     | (b) Describe any methods used to examine subgroups and interactions                                                                                                                                          | N/A   |                                                                                                                                 |
|                   |     | (c) Explain how missing data were addressed                                                                                                                                                                  | 9     | Data analysis sub-section                                                                                                       |
|                   |     | (d) If applicable, describe analytical methods taking account of sampling strategy                                                                                                                           | N/A   |                                                                                                                                 |
|                   |     | (e) Describe any sensitivity analyses                                                                                                                                                                        | N/A   |                                                                                                                                 |
| <b>Results</b>    |     |                                                                                                                                                                                                              |       |                                                                                                                                 |
| Participants      | 13* | (a) Report numbers of individuals at each stage of study—eg numbers potentially eligible, examined for eligibility, confirmed eligible, included in the study, completing follow-up, and analysed            | 9-11  | Results section and appendix 1                                                                                                  |
|                   |     | (b) Give reasons for non-participation at each stage                                                                                                                                                         | N/A   |                                                                                                                                 |
|                   |     | (c) Consider use of a flow diagram                                                                                                                                                                           | N/A   |                                                                                                                                 |
| Descriptive data  | 14* | (a) Give characteristics of study participants (eg demographic, clinical, social) and information on exposures and potential confounders                                                                     | 10-11 | Table 1                                                                                                                         |
|                   |     | (b) Indicate number of participants with missing data for each variable of interest                                                                                                                          | 10-11 | Table 1                                                                                                                         |
| Outcome data      | 15* | Report numbers of outcome events or summary measures                                                                                                                                                         | 12-14 | Tables 2a and 2b                                                                                                                |
| Main results      | 16  | (a) Give unadjusted estimates and, if applicable, confounder-adjusted estimates and their precision (eg, 95% confidence interval). Make clear which confounders were adjusted for and why they were included | 15-16 | Results sub-section presenting adjusted odds ratios, Figure 1, and appendices 3a and 3b for adjusted and unadjusted odds ratios |
|                   |     | (b) Report category boundaries when continuous variables were categorized                                                                                                                                    | N/A   |                                                                                                                                 |
|                   |     | (c) If relevant, consider translating estimates of relative risk into absolute risk for a meaningful time period                                                                                             | N/A   |                                                                                                                                 |
| Other analyses    | 17  | Report other analyses done—eg analyses of subgroups and interactions, and sensitivity analyses                                                                                                               | N/A   |                                                                                                                                 |
| <b>Discussion</b> |     |                                                                                                                                                                                                              |       |                                                                                                                                 |
| Key results       | 18  | Summarise key results with reference to study objectives                                                                                                                                                     | 15    | First paragraph of Discussion section                                                                                           |
| Limitations       | 19  | Discuss limitations of the study, taking into account sources of potential bias or imprecision. Discuss both direction and magnitude of any potential bias                                                   | 17    | Limitations of this study                                                                                                       |

|                          |    |                                                                                                                                                                            |              |                                                                          |
|--------------------------|----|----------------------------------------------------------------------------------------------------------------------------------------------------------------------------|--------------|--------------------------------------------------------------------------|
| Interpretation           | 20 | Give a cautious overall interpretation of results considering objectives, limitations, multiplicity of analyses, results from similar studies, and other relevant evidence | 15-18        | Discussion section relevant sections and interaction with the literature |
| Generalisability         | 21 | Discuss the generalisability (external validity) of the study results                                                                                                      | 18           | Second to last paragraph of discussion section                           |
| <b>Other information</b> |    |                                                                                                                                                                            |              |                                                                          |
| Funding                  | 22 | Give the source of funding and the role of the funders for the present study and, if applicable, for the original study on which the present article is based              | 4, 9 & 21-22 | Abstract, end of Methods section, and Acknowledgements section           |

**3a. Association between facility and individual characteristics and infection-related severe maternal outcomes (SMO)\* among women enrolled during pregnancy or childbirth, presented as proportions and as crude and adjusted odds ratios with 95% confidence intervals (N = 1,100)**

| Variable                                                   |                        | SMO/women | aOR [95% CI]       | cOR [95% CI]       |
|------------------------------------------------------------|------------------------|-----------|--------------------|--------------------|
| <b>General characteristics</b>                             |                        |           |                    |                    |
| Urban facility                                             | No                     | 11/75     | 2.44 [1.02 - 5.85] | 1.32 [0.65 - 2.68] |
|                                                            | Yes                    | 111/1025  | ref                | ref                |
| Income group                                               | LIC                    | 37/244    | 2.01 [0.95 - 4.26] | 1.61 [0.89 - 2.89] |
|                                                            | LMIC                   | 45/452    | 1.27 [0.66 - 2.46] | 1.01 [0.58 - 1.75] |
|                                                            | UMHIC                  | 40/404    | ref                | ref                |
| Public facility                                            | No                     | 19/162    | 0.99 [0.46 - 2.11] | 0.76 [0.39 - 1.49] |
|                                                            | Yes                    | 103/938   | ref                | ref                |
| Size                                                       | 1000 - 2499 livebirths | 15/154    | 0.56 [0.27 - 1.16] | 0.51 [0.27 - 0.98] |
|                                                            | ≥ 4500 livebirths      | 57/568    | 0.44 [0.26 - 0.75] | 0.59 [0.38 - 0.93] |
|                                                            | < 1000 livebirths      | 5/83      | 0.23 [0.07 - 0.74] | 0.33 [0.12 - 0.89] |
|                                                            | 2500 - 4499 livebirths | 45/295    | ref                | ref                |
| <b>Obstetric capacity</b>                                  |                        |           |                    |                    |
| BEmONC capacity                                            | No                     | 7/110     | 0.83 [0.33 - 2.11] | 0.50 [0.22 - 1.13] |
|                                                            | Yes                    | 115/990   | ref                | ref                |
| <b>Infection prevention</b>                                |                        |           |                    |                    |
| Availability of resources for hygiene                      | No                     | 8/68      | 1.06 [0.41 - 2.69] | 0.98 [0.43 - 2.23] |
|                                                            | Yes                    | 114/1032  | ref                | ref                |
| Availability of resources for sanitation                   | No                     | 17/141    | 1.02 [0.53 - 1.95] | 1.07 [0.60 - 1.90] |
|                                                            | Yes                    | 105/959   | ref                | ref                |
| Availability of infection prevention committee             | No                     | 11/87     | 0.70 [0.30 - 1.61] | 1.09 [0.54 - 2.22] |
|                                                            | Yes                    | 111/1013  | ref                | ref                |
| Availability of resources for waste management             | No                     | 41/453    | 0.66 [0.40 - 1.09] | 0.66 [0.43 - 1.01] |
|                                                            | Yes                    | 81/647    | ref                | ref                |
| <b>Clinical capacity</b>                                   |                        |           |                    |                    |
| Capacity to perform cultures                               | No                     | 18/162    | 1.03 [0.53 - 2.02] | 0.95 [0.53 - 1.68] |
|                                                            | Yes                    | 104/938   | ref                | ref                |
| <b>Compliance with clinical and laboratory assessments</b> |                        |           |                    |                    |
| Blood pressure <sup>1</sup>                                | Low                    | 9/66      | 2.95 [1.06 - 8.22] | 1.28 [0.56 - 2.92] |
|                                                            | High                   | 113/1034  | ref                | ref                |
| Respiration rate <sup>1</sup>                              | Low                    | 29/278    | 0.71 [0.39 - 1.29] | 0.87 [0.53 - 1.44] |
|                                                            | High                   | 93/822    | ref                | ref                |
| White blood cell count                                     | Low                    | 21/225    | 0.64 [0.34 - 1.21] | 0.61 [0.35 - 1.07] |
|                                                            | High                   | 101/875   | ref                | ref                |
| Mental status <sup>1</sup>                                 | Low                    | 6/84      | 0.43 [0.16 - 1.17] | 0.53 [0.21 - 1.31] |
|                                                            | High                   | 116/1016  | ref                | ref                |
| <b>Individual characteristics</b>                          |                        |           |                    |                    |
| Maternal pre-existing condition                            | No                     | 100/1029  | ref                | ref                |
|                                                            | Yes                    | 22/71     | 4.59 [2.45 - 8.57] | 4.15 [2.37 - 7.26] |

|                                           |                       |        |                    |                    |
|-------------------------------------------|-----------------------|--------|--------------------|--------------------|
| Enrolment                                 | From another hospital | 33/181 | 2.43 [1.43 - 4.12] | 2.25 [1.40 - 3.64] |
|                                           | Already hospitalized  | 28/251 | 1.46 [0.87 - 2.44] | 1.28 [0.79 - 2.06] |
|                                           | From home             | 61/668 | ref                | ref                |
| Previous births                           | > 2                   | 22/162 | 2.09 [1.06 - 4.13] | 1.80 [1.02 - 3.15] |
|                                           | 1 or 2                | 59/434 | 1.89 [1.17 - 3.04] | 1.79 [1.17 - 2.73] |
|                                           | 0                     | 41/504 | ref                | ref                |
| Anaemia                                   | No                    | 68/756 | ref                | ref                |
|                                           | Yes                   | 54/344 | 1.81 [1.18 - 2.78] | 1.97 [1.32 - 2.94] |
| Age in years (x) <sup>2</sup>             | x+1                   | -      | 0.99 [0.95 - 1.02] | 1.01 [0.98 - 1.04] |
| Gestational age in weeks (x) <sup>3</sup> | x+1                   | -      | 0.96 [0.94 - 0.98] | 0.97 [0.95 - 0.99] |

\*Severe maternal outcome includes maternal near-miss and death

cOR: crude odds ratio

aOR: adjusted odds ratio

CI: confidence interval

LIC: low-income country; LMIC: lower-middle income country; UMHIC: upper-middle/high-income country

BEmONC: basic emergency obstetric and newborn care

<sup>1</sup> Measures used for the qSOFA score for identifying high-risk patients for sepsis-related mortality

<sup>2</sup> As compared to women one year younger

<sup>3</sup> As compared to women with a gestational age of one week less



**3b. Association between facility and individual characteristics and infection-related severe maternal outcomes (SMO)\* among women enrolled during postpartum or post-abortion period, presented as proportions and as crude and adjusted odds ratios with 95% confidence intervals (N = 1,252)**

| Variable                                                     |                        | SMO/women | aOR [95% CI]       | cOR [95% CI]       |
|--------------------------------------------------------------|------------------------|-----------|--------------------|--------------------|
| <b>General characteristics</b>                               |                        |           |                    |                    |
| Income group                                                 | LIC                    | 100/443   | 1.84 [1.05 - 3.22] | 1.77 [1.03 - 3.06] |
|                                                              | LMIC                   | 79/506    | 1.24 [0.73 - 2.09] | 1.11 [0.64 - 1.92] |
|                                                              | UMHIC                  | 42/303    | ref                | ref                |
| Public facility                                              | No                     | 14/83     | 1.23 [0.59 - 2.58] | 0.96 [0.51 - 1.82] |
|                                                              | Yes                    | 207/1169  | ref                | ref                |
| Size                                                         | < 1000 livebirths      | 14/78     | 0.98 [0.44 - 2.20] | 1.08 [0.52 - 2.22] |
|                                                              | 1000 - 2499 livebirths | 22/129    | 0.97 [0.51 - 1.84] | 1.12 [0.61 - 2.05] |
|                                                              | 2500 - 4499 livebirths | 45/275    | ref                | ref                |
|                                                              | ≥ 4500 livebirths      | 140/770   | 0.93 [0.59 - 1.45] | 1.06 [0.71 - 1.60] |
| Urban facility                                               | No                     | 17/124    | 0.89 [0.47 - 1.68] | 0.64 [0.35 - 1.15] |
|                                                              | Yes                    | 204/1128  | ref                | ref                |
| <b>Obstetric capacity</b>                                    |                        |           |                    |                    |
| BEmONC capacity                                              | No                     | 24/111    | 1.37 [0.77 - 2.46] | 1.27 [0.75 - 2.15] |
|                                                              | Yes                    | 197/1141  | ref                | ref                |
| <b>Infection prevention</b>                                  |                        |           |                    |                    |
| Availability of resources for waste management               | No                     | 105/543   | 1.35 [0.94 - 1.94] | 1.17 [0.84 - 1.63] |
|                                                              | Yes                    | 116/709   | ref                | ref                |
| Availability of infection prevention committee               | No                     | 19/101    | 1.20 [0.64 - 2.23] | 1.07 [0.60 - 1.91] |
|                                                              | Yes                    | 202/1151  | ref                | ref                |
| Availability of resources for hygiene                        | No                     | 17/107    | 0.77 [0.40 - 1.48] | 0.71 [0.37 - 1.34] |
|                                                              | Yes                    | 204/1145  | ref                | ref                |
| Availability of resources for sanitation                     | No                     | 30/176    | 0.70 [0.41 - 1.19] | 0.76 [0.46 - 1.23] |
|                                                              | Yes                    | 191/1076  | ref                | ref                |
| <b>Clinical capacity</b>                                     |                        |           |                    |                    |
| Capacity to perform cultures                                 | No                     | 44/247    | 0.82 [0.53 - 1.28] | 0.96 [0.63 - 1.47] |
|                                                              | Yes                    | 177/1005  | ref                | ref                |
| <b>Compliance with clinical &amp; laboratory assessments</b> |                        |           |                    |                    |
| Respiration rate <sup>1</sup>                                | Low                    | 55/306    | 1.05 [0.68 - 1.63] | 0.97 [0.64 - 1.46] |
|                                                              | High                   | 166/946   | ref                | ref                |
| White blood cell count                                       | Low                    | 59/317    | 0.92 [0.59 - 1.43] | 1.06 [0.71 - 1.58] |
|                                                              | High                   | 162/935   | ref                | ref                |
| Mental status <sup>1</sup>                                   | Low                    | 13/111    | 0.65 [0.32 - 1.31] | 0.67 [0.35 - 1.30] |
|                                                              | High                   | 208/1141  | ref                | ref                |
| Blood pressure <sup>1</sup>                                  | Low                    | 7/72      | 0.46 [0.18 - 1.20] | 0.50 [0.21 - 1.20] |
|                                                              | High                   | 214/1180  | ref                | ref                |
| <b>Individual characteristics</b>                            |                        |           |                    |                    |
| Enrolment                                                    | From another hospital  | 60/162    | 3.94 [2.52 - 6.15] | 3.78 [2.47 - 5.79] |
|                                                              | Already hospitalized   | 95/579    | 1.46 [1.00 - 2.12] | 1.39 [0.98 - 1.98] |
|                                                              | From home              | 66/511    | ref                | ref                |

|                                 |                 |          |                    |                    |
|---------------------------------|-----------------|----------|--------------------|--------------------|
| Maternal pre-existing condition | No              | 189/1169 | ref                | ref                |
|                                 | Yes             | 32/83    | 3.22 [1.93 - 5.38] | 3.09 [1.89 - 5.04] |
| Previous births                 | > 2             | 60/245   | 2.37 [1.40 - 4.02] | 2.20 [1.47 - 3.28] |
|                                 | 1 or 2          | 93/467   | 1.76 [1.19 - 2.61] | 1.75 [1.24 - 2.48] |
|                                 | 0               | 68/540   | ref                | ref                |
| Mode of end of pregnancy        | Abortion        | 51/228   | 1.71 [1.09 - 2.69] | 1.58 [1.03 - 2.42] |
|                                 | Caesarean birth | 107/617  | 1.30 [0.89 - 1.89] | 1.14 [0.80 - 1.61] |
|                                 | Vaginal birth   | 63/407   | ref                | ref                |
| Anaemia                         | No              | 133/870  | ref                | ref                |
|                                 | Yes             | 88/382   | 1.50 [1.07 - 2.10] | 1.77 [1.28 - 2.44] |
| Age in years (x) <sup>2</sup>   | x+1             | -        | 0.99 [0.97 - 1.02] | 1.03 [1.01 - 1.05] |

\*Severe maternal outcome includes maternal near-miss and death

cOR: crude odds ratio

aOR: adjusted odds ratio

CI: confidence interval

LIC: low-income country; LMIC: lower-middle income country; UMHIC: upper-middle/high-income country

BEmONC: basic emergency obstetric and newborn care

<sup>1</sup> Measures used for the qSOFA score for identifying high-risk patients for sepsis-related mortality

<sup>2</sup> As compared to women one year younger
